# Supplementary material for: Recyclable (PhSe)2-catalyzed selective oxidation of isatin by H2O2: a practical and waste-free access to isatoic anhydride under mild and neutral conditions
Source: Royal Society of Chemistry journal article supplement (doi:10.1039/c5cy01030f), 2015-01-01

**ESI for:**

**Recyclable (PhSe)<sub>2</sub>-Catalyzed Selective Oxidation of Isatin  
by H<sub>2</sub>O<sub>2</sub>: A Practical and Waste-Free Access to Isatoic  
Anhydride under Mild and Neutral Conditions**

Lei Yu,<sup>\*a,b</sup> Jianqing Ye,<sup>a</sup> Xu Zhang,<sup>a,b</sup> Yuanhua Ding<sup>a</sup> and Qing Xu<sup>\*b</sup>

<sup>a</sup> Jiangsu Co-innovation Center for Prevention and Control of Important Animal Infectious Diseases and Zoonoses, School of Chemistry and Chemical Engineering, Yangzhou University, Yangzhou, Jiangsu 225002, China

<sup>b</sup> Zhejiang Key Laboratory of Carbon Materials, College of Chemistry and Materials Engineering, Wenzhou University, Wenzhou, Zhejiang 325035, China

**Contents**

|                                                                       |           |
|-----------------------------------------------------------------------|-----------|
| <b>Detailed conditional optimization tables.....</b>                  | <b>S2</b> |
| <b><sup>1</sup>H and <sup>13</sup>C NMR Spectra of Products .....</b> | <b>S7</b> |

## Detailed conditional optimization tables

**Table S1. Optimization of Solvents.<sup>a</sup>**

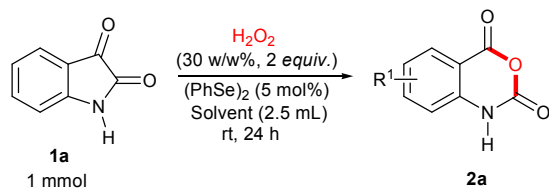

| Entry    | solvent          | yield (%) <sup>b</sup> |
|----------|------------------|------------------------|
| <b>1</b> | <b>MeCN</b>      | <b>72</b>              |
| 2        | <i>t</i> -BuOH   | 40                     |
| 3        | <i>i</i> -PrOH   | 42                     |
| 4        | EtOH             | 43                     |
| 5        | MeOH             | 40                     |
| 6        | H <sub>2</sub> O | 11                     |
| <b>7</b> | <b>DMF</b>       | <b>65</b>              |
| 8        | NMP              | 23                     |
| 9        | DMSO             | 0                      |
| 10       | THF              | 30                     |

<sup>a</sup> 1 mmol of **1a**, 2 mmol of  $\text{H}_2\text{O}_2$ , 0.05 mmol of  $(\text{PhSe})_2$  and 2.5 mL of solvent were stirred at room temperature (25 °C) for 24 h; <sup>b</sup> Isolated yields.

**Table S2. DMF concentration effect test.<sup>a</sup>**

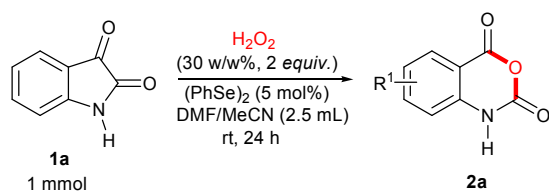

| Entry | DMF (%) <sup>b</sup> | yield (%) <sup>c</sup> |
|-------|----------------------|------------------------|
| 1     | 0                    | 72                     |
| 2     | 3                    | 82                     |

|          |          |           |
|----------|----------|-----------|
| 3        | 6        | 86        |
| <b>4</b> | <b>9</b> | <b>88</b> |
| 5        | 12       | 87        |
| 6        | 21       | 83        |
| 7        | 30       | 75        |
| 8        | 60       | 66        |
| 9        | 100      | 65        |

<sup>a</sup> 1 mmol of **1a**, 2 mmol of H<sub>2</sub>O<sub>2</sub>, 0.05 mmol of (PhSe)<sub>2</sub> and 2.5 mL of solvent were stirred at room temperature (25 °C) for 24 h; <sup>b</sup> Volume concentration; <sup>c</sup> Isolated yields.

**Table S3. Temperature effect test.<sup>a</sup>**

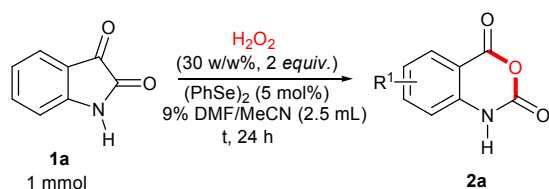

| Entry    | <i>t</i> (°C) | Yield (%) <sup>b</sup> |
|----------|---------------|------------------------|
| <b>1</b> | <b>25</b>     | <b>88</b>              |
| 2        | 40            | 78                     |
| 3        | 60            | 67                     |
| 4        | 80            | 62                     |

<sup>a</sup> 1 mmol of **1a**, 2 mmol of H<sub>2</sub>O<sub>2</sub>, 0.05 mmol of (PhSe)<sub>2</sub> and 2.5 mL of 9% DMF/MeCN were stirred at different temperatures for 24 h; <sup>b</sup> Isolated yields.

**Table S4. Time effect test.<sup>a</sup>**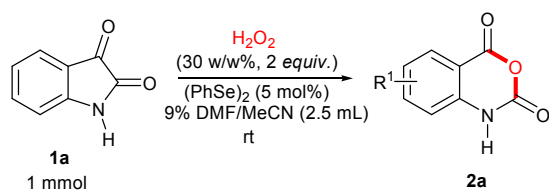

| Entry    | t (h)    | Yield (%) <sup>b</sup> |
|----------|----------|------------------------|
| 1        | 4        | 54                     |
| 2        | 6        | 68                     |
| <b>3</b> | <b>8</b> | <b>88</b>              |
| 4        | 12       | 88                     |
| 5        | 24       | 87                     |

<sup>a</sup> 1 mmol of **1a**, 2 mmol of  $\text{H}_2\text{O}_2$ , 0.05 mmol of  $(\text{PhSe})_2$  and 2.5 mL of 9% DMF/MeCN were stirred at room temperature (25 °C) for different times; <sup>b</sup> Isolated yields.

**Table S5.  $\text{H}_2\text{O}_2$  dosage effect test.<sup>a</sup>**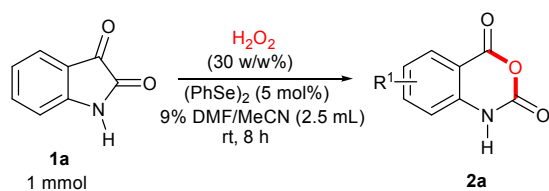

| Entry    | $\text{H}_2\text{O}_2$ Dosage (mol%) | Yield (%) <sup>b</sup> |
|----------|--------------------------------------|------------------------|
| 1        | 50                                   | 40                     |
| 2        | 100                                  | 62                     |
| 3        | 150                                  | 73                     |
| <b>4</b> | <b>200</b>                           | <b>88</b>              |

<sup>a</sup> 1 mmol of **1a**, H<sub>2</sub>O<sub>2</sub>, 0.05 mmol of (PhSe)<sub>2</sub> and 2.5 mL of 9% DMF/MeCN were stirred at room temperature (25 °C) for 8 h; <sup>b</sup> Isolated yields.

**Table S6. (PhSe)<sub>2</sub> loading effect test.<sup>a</sup>**

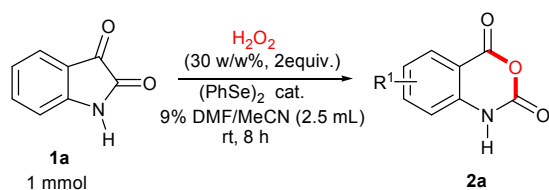

| Entry    | (PhSe) <sub>2</sub> /mol% | Yield(%) <sup>b</sup> |
|----------|---------------------------|-----------------------|
| 1        | 1                         | 78                    |
| 2        | 3                         | 84                    |
| <b>3</b> | <b>5</b>                  | <b>88</b>             |
| 4        | 10                        | 86                    |
| 5        | 15                        | 77                    |

<sup>a</sup> 1 mmol of **1a**, 2 mmol of H<sub>2</sub>O<sub>2</sub>, catalytic (PhSe)<sub>2</sub> and 2.5 mL of 9% DMF/MeCN were stirred at room temperature (25 °C) for 8 h; <sup>b</sup> Isolated yields.

**Table S7. Catalyst screenings.<sup>a</sup>**

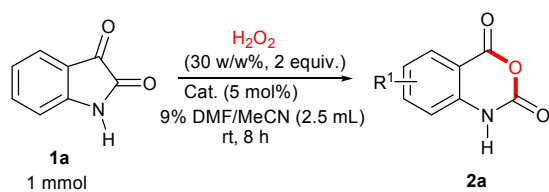

| Entry    | Cat.                                                                                        | Yield(%) <sup>b</sup> |
|----------|---------------------------------------------------------------------------------------------|-----------------------|
| <b>1</b> | <b>(PhSe)<sub>2</sub></b>                                                                   | <b>88</b>             |
| 2        | ( <i>p</i> -CH <sub>3</sub> OC <sub>6</sub> H <sub>4</sub> Se) <sub>2</sub>                 | 82                    |
| 3        | [ <i>p</i> -(CH <sub>3</sub> ) <sub>2</sub> NC <sub>6</sub> H <sub>4</sub> Se] <sub>2</sub> | 70                    |
| 4        | ( <i>m</i> -CH <sub>3</sub> OC <sub>6</sub> H <sub>4</sub> Se) <sub>2</sub>                 | 80                    |

|    |                                                                                     |    |
|----|-------------------------------------------------------------------------------------|----|
| 5  | ( <i>m</i> -ClC <sub>6</sub> H <sub>4</sub> Se) <sub>2</sub>                        | 78 |
| 6  | ( <i>m</i> -FC <sub>6</sub> H <sub>4</sub> Se) <sub>2</sub>                         | 82 |
| 7  | [3,5-(CF <sub>3</sub> ) <sub>2</sub> C <sub>6</sub> H <sub>3</sub> Se] <sub>2</sub> | 69 |
| 8  | EtSePh                                                                              | 62 |
| 9  | <i>i</i> -PrSePh                                                                    | 68 |
| 10 | <i>c</i> -C <sub>6</sub> H <sub>11</sub> SePh                                       | 64 |
| 11 | PhSePh                                                                              | 38 |
| 12 | PhSeOOH                                                                             | 80 |
| 13 | PhSeBr                                                                              | 78 |
| 14 | SeO <sub>2</sub>                                                                    | 3  |
| 15 | (PhS) <sub>2</sub>                                                                  | 18 |
| 16 | (PhTe) <sub>2</sub>                                                                 | 22 |
| 17 | -                                                                                   | 0  |

---

<sup>a</sup> 1 mmol of **1a**, 2 equiv. H<sub>2</sub>O<sub>2</sub>, 0.05 mmol of catalyst and 2.5 mL of 9% DMF/MeCN were stirred at room temperature (25 °C) for 8 h; <sup>b</sup> Isolated yields.

**$^1\text{H}$  and  $^{13}\text{C}$  NMR Spectra of Products (for samples in DMSO- $d_6$  solution, the peaks around 3.4 ppm and 2.5 ppm are inevitable solvent peaks)**

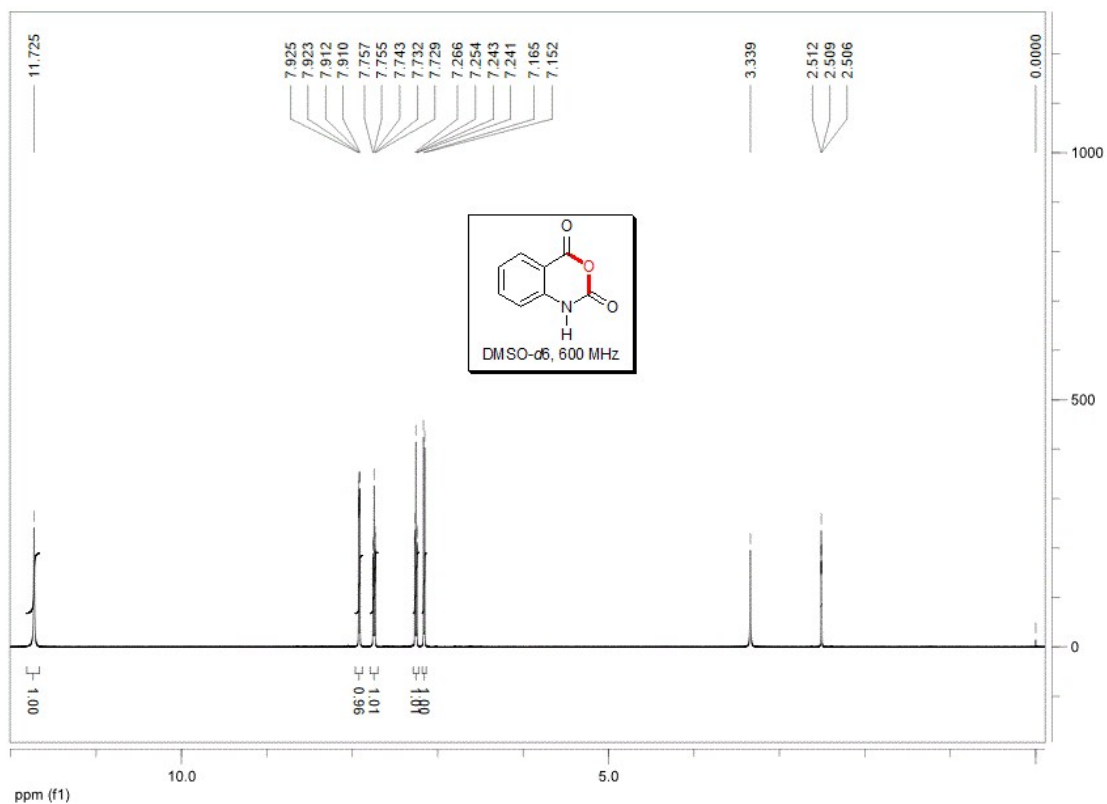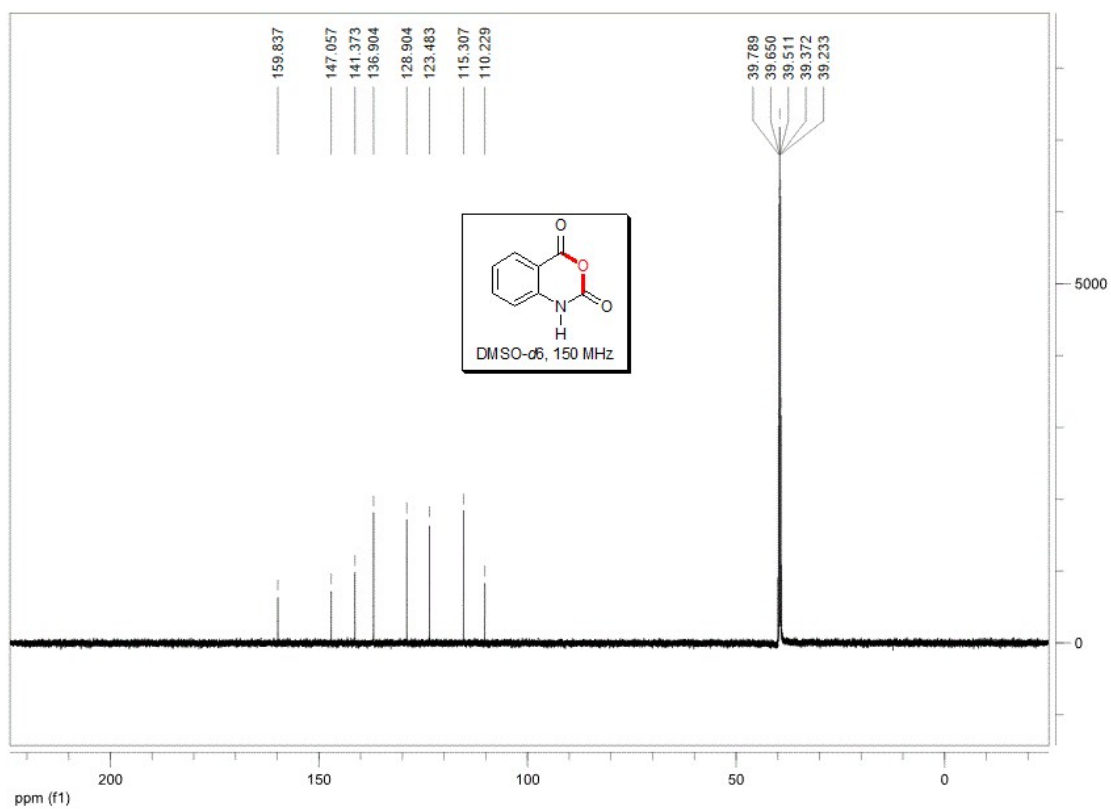

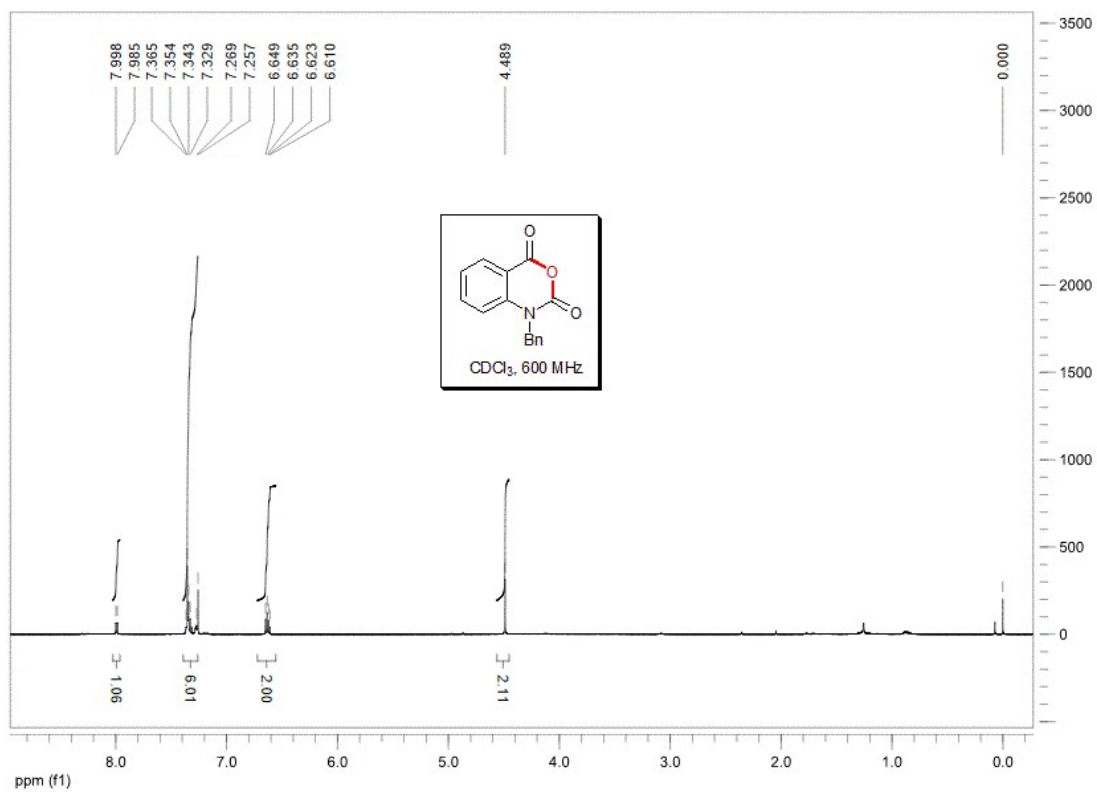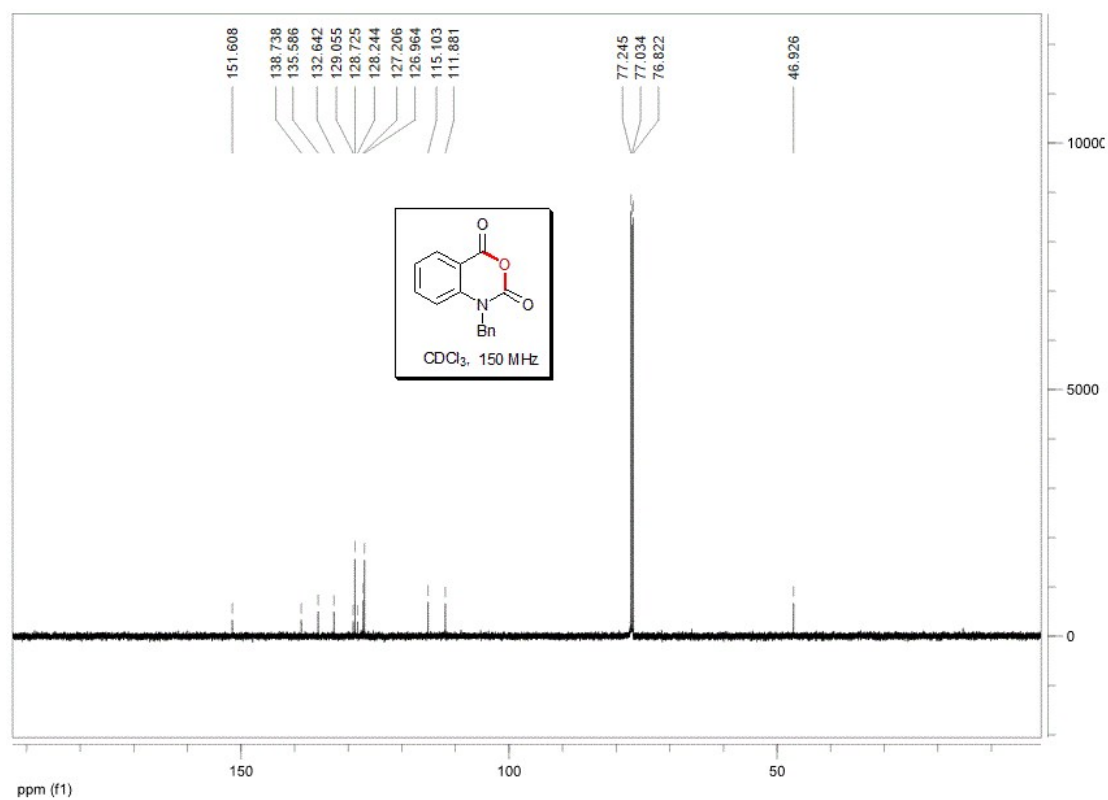



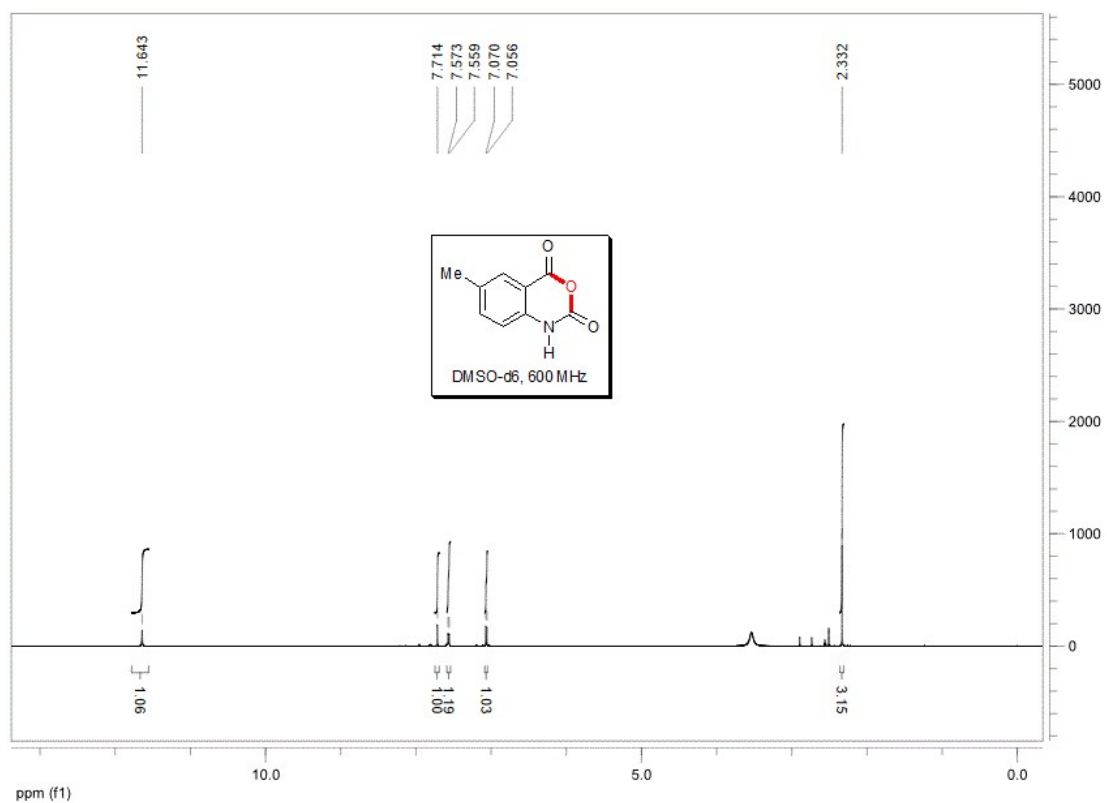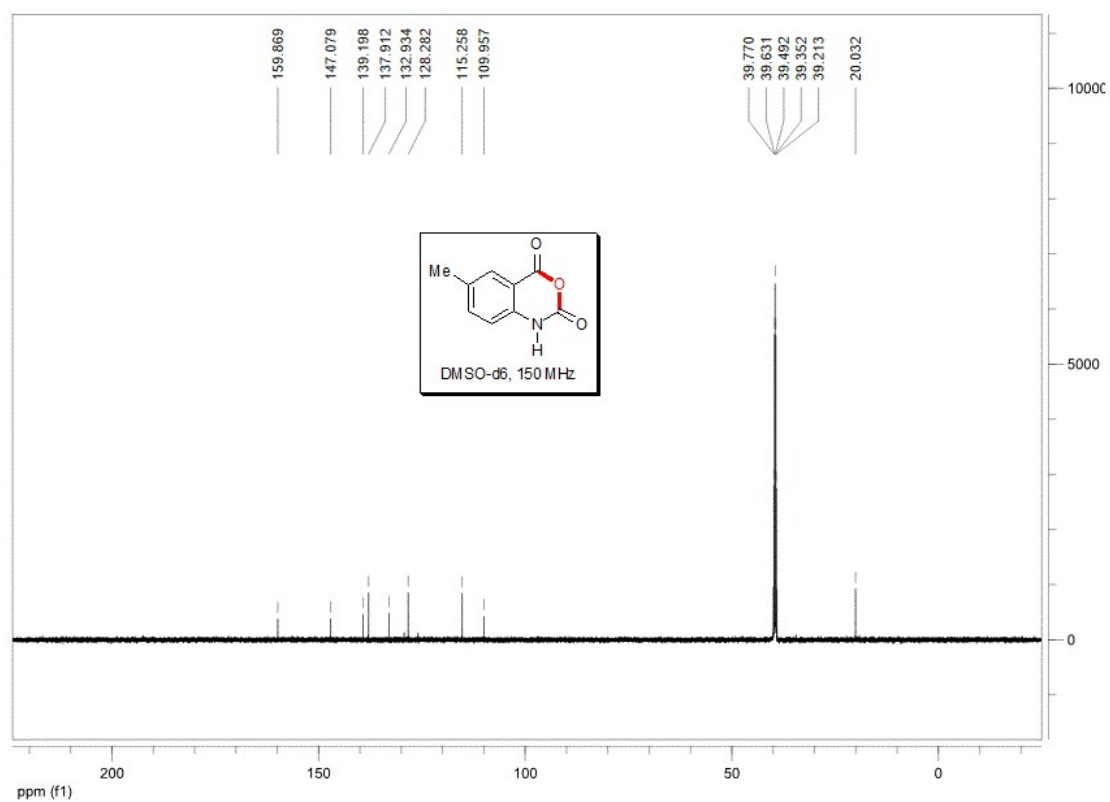

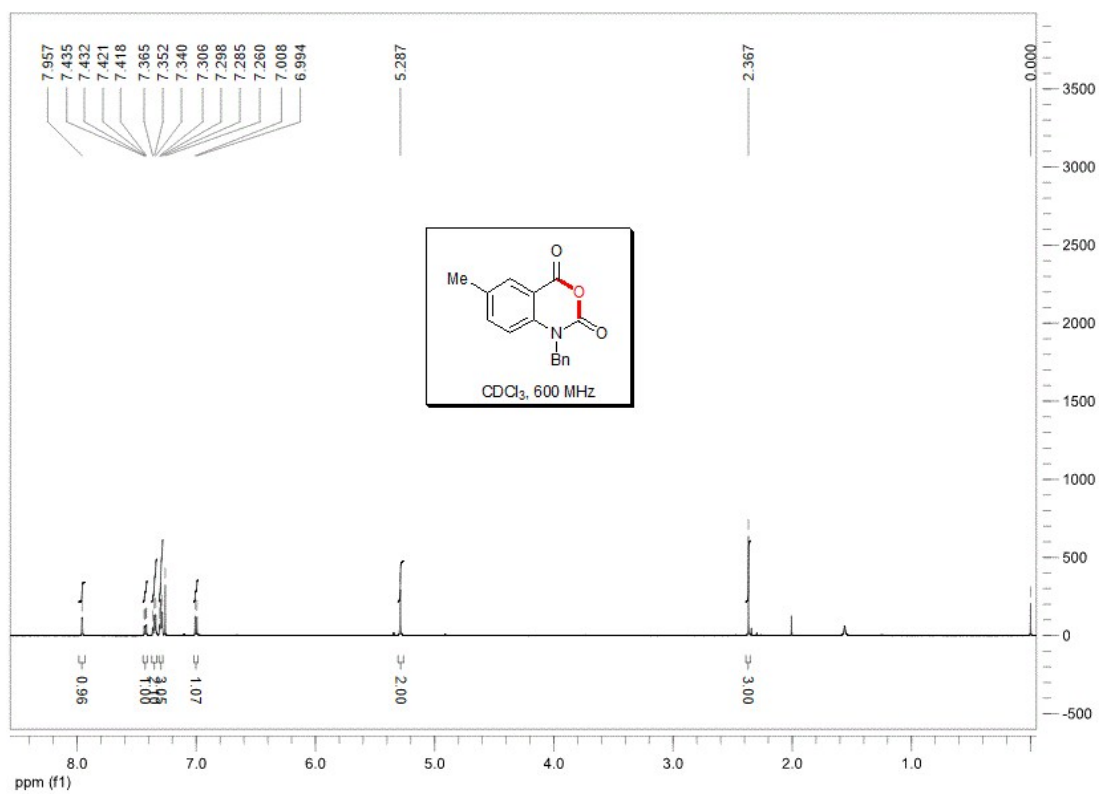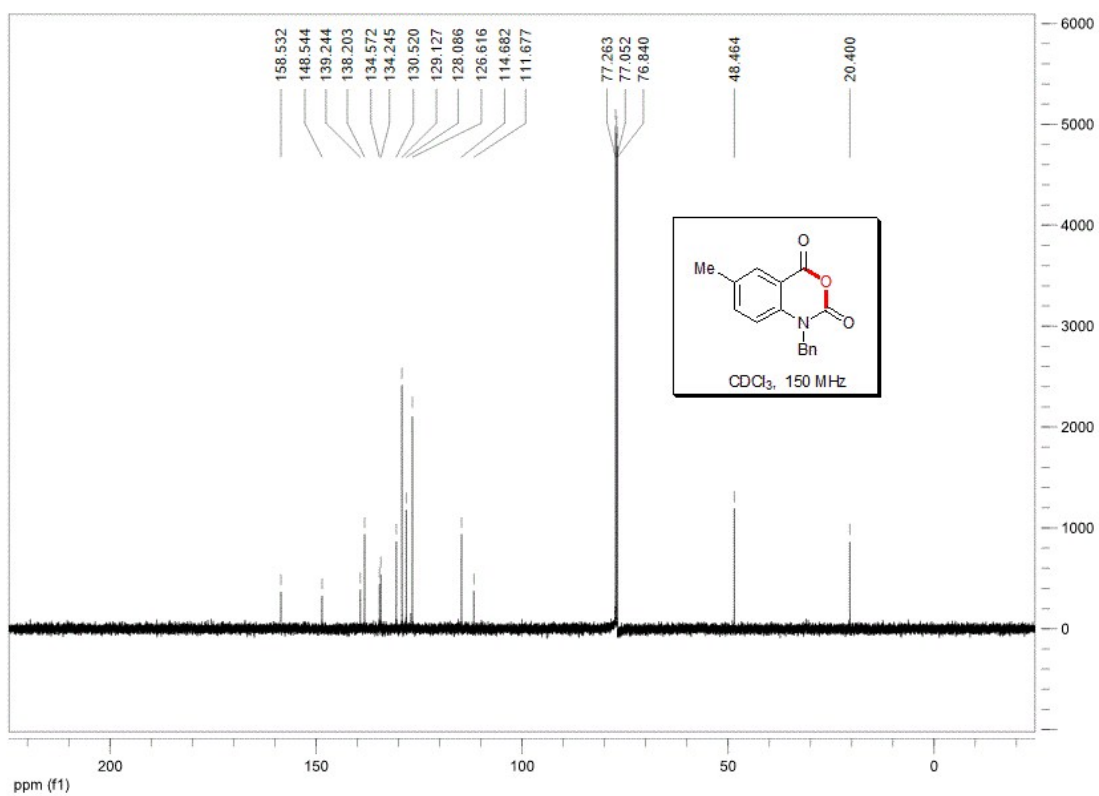

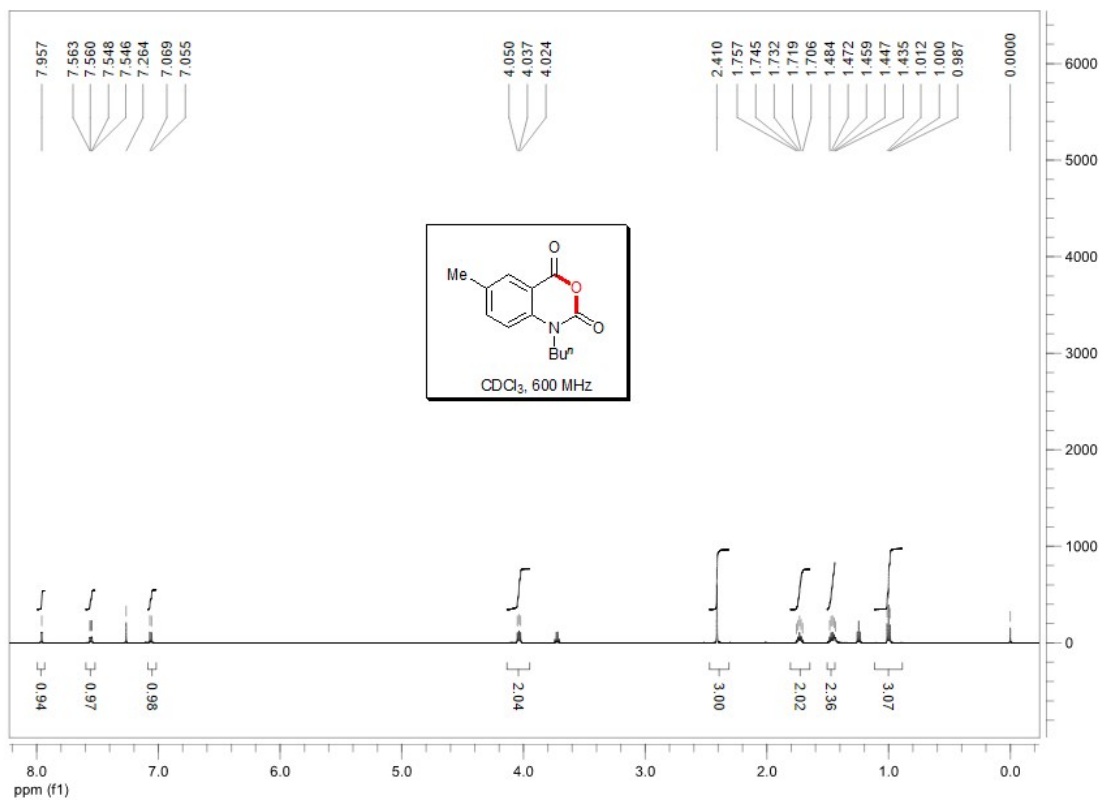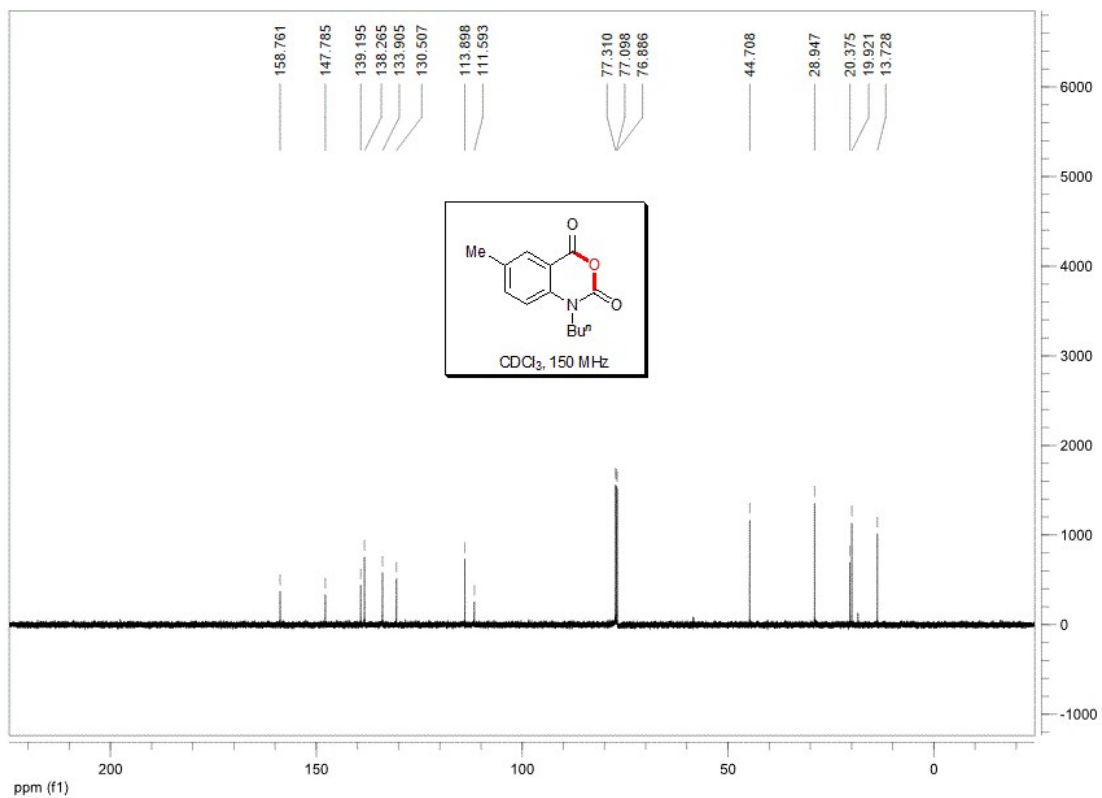

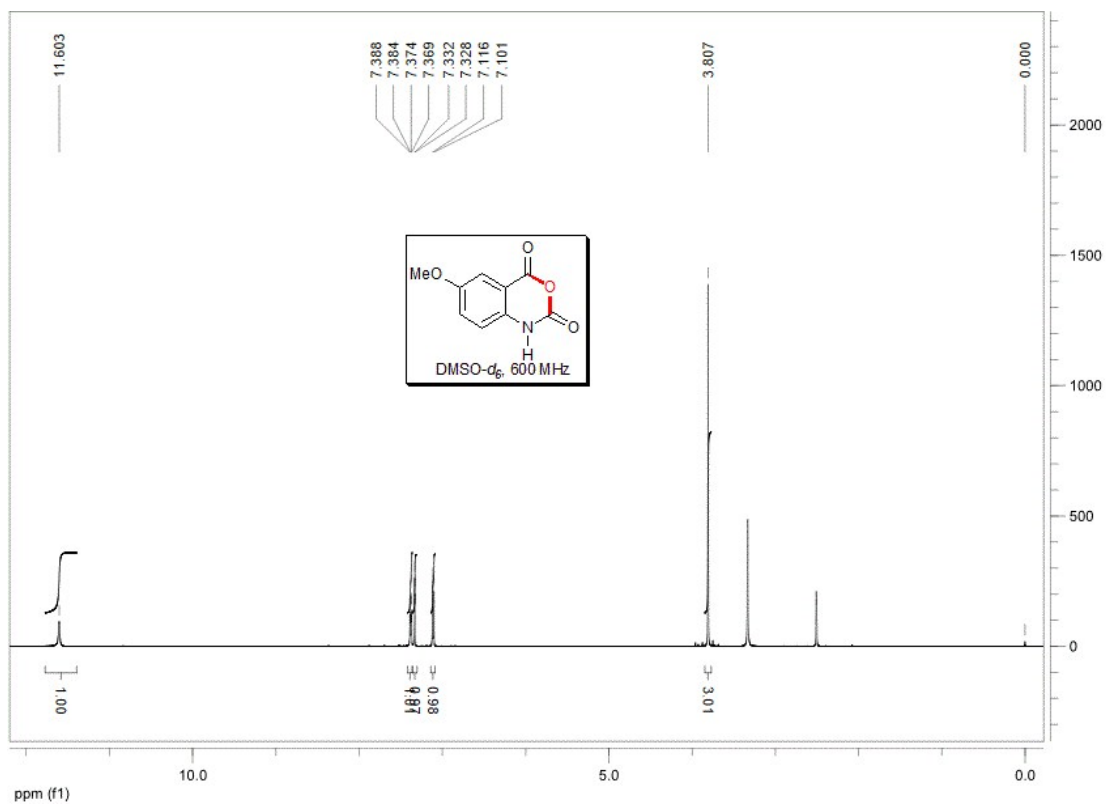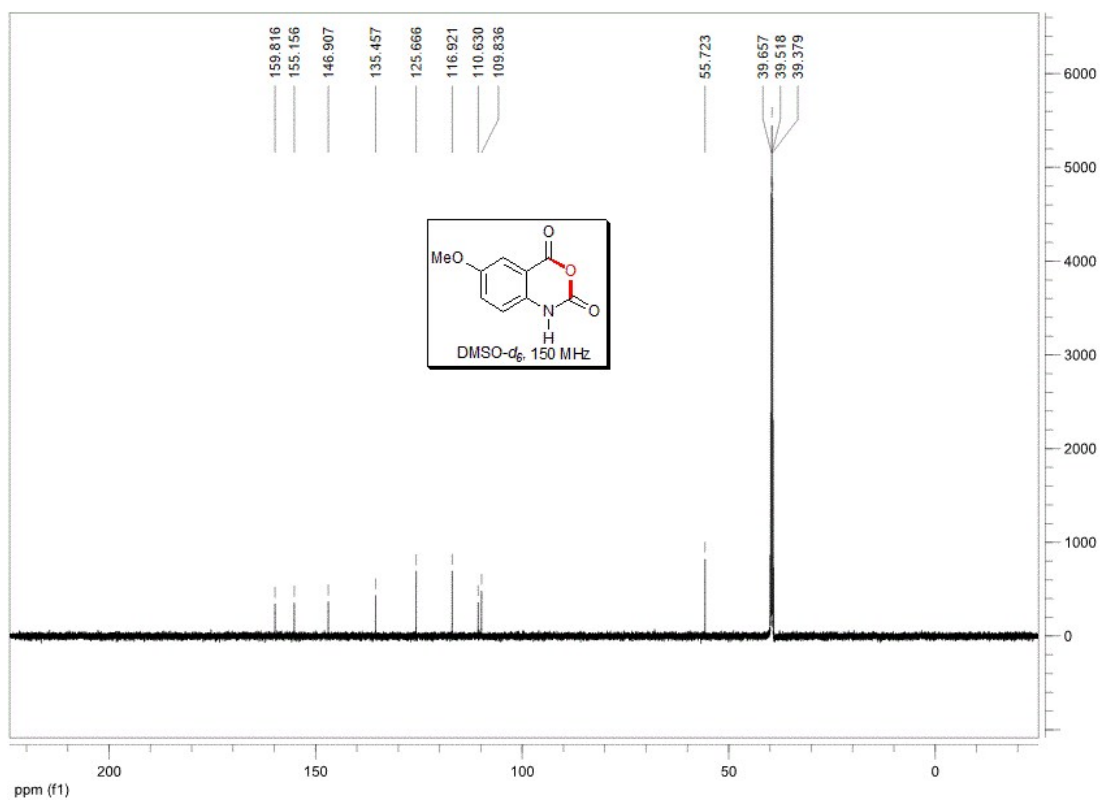

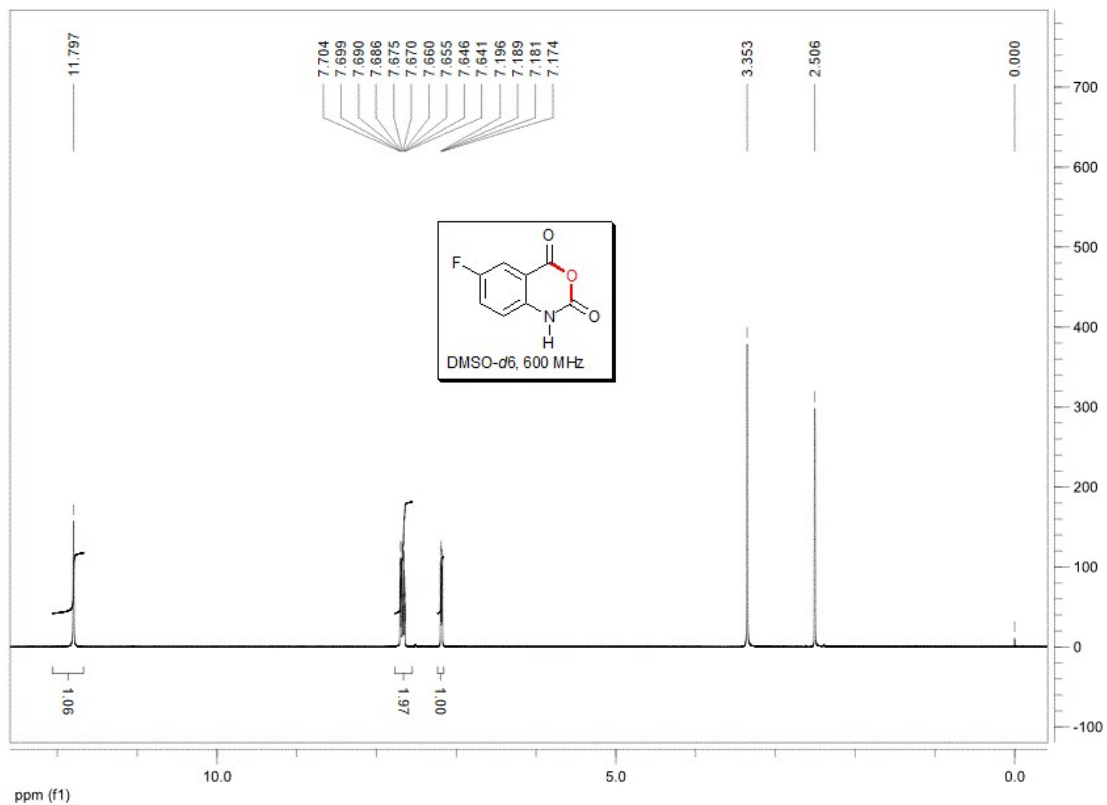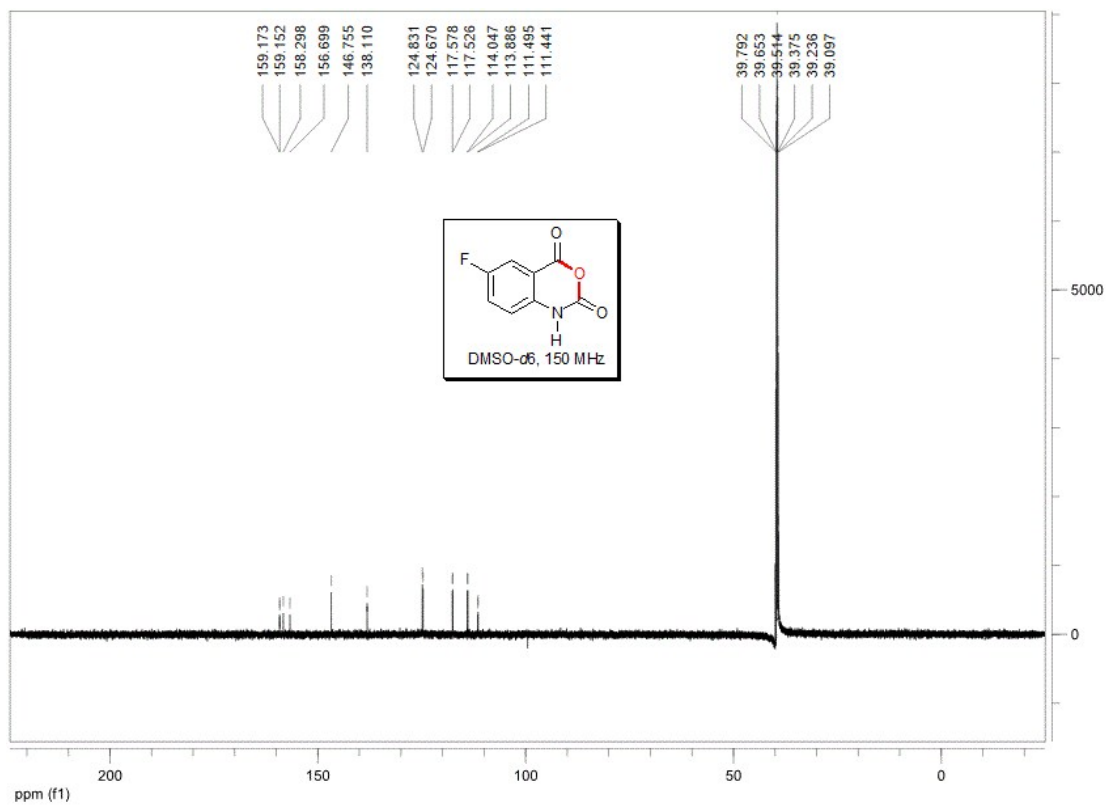

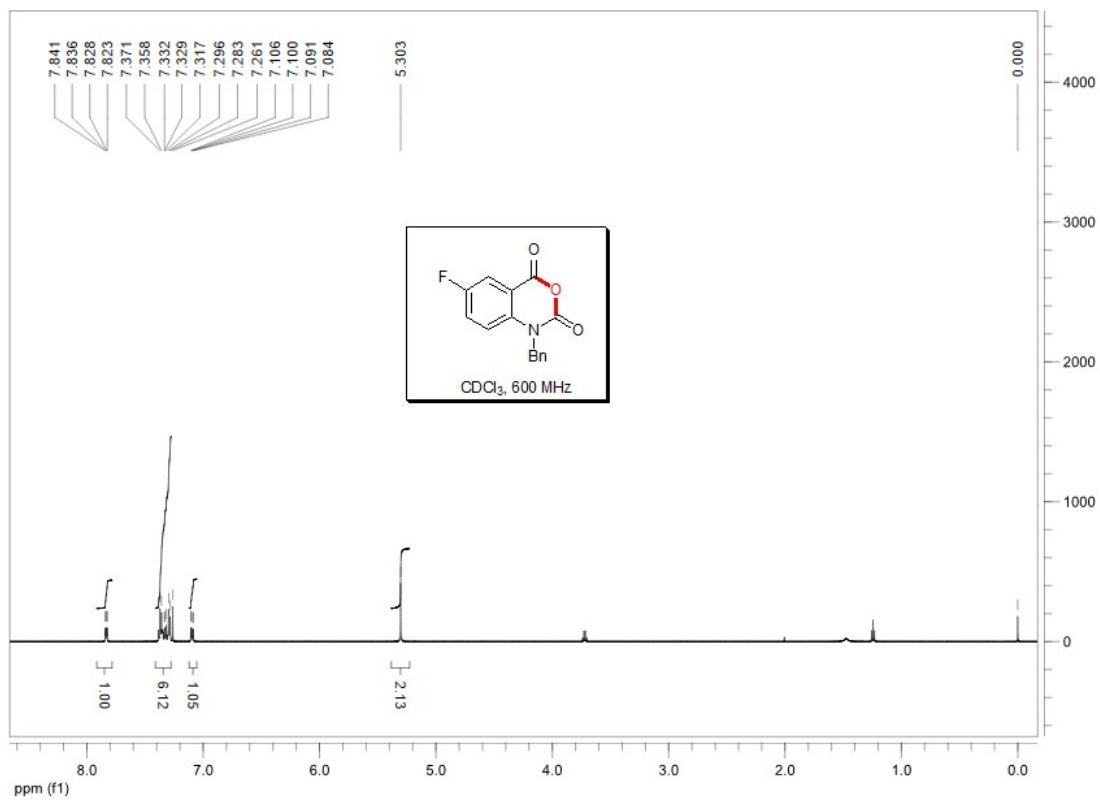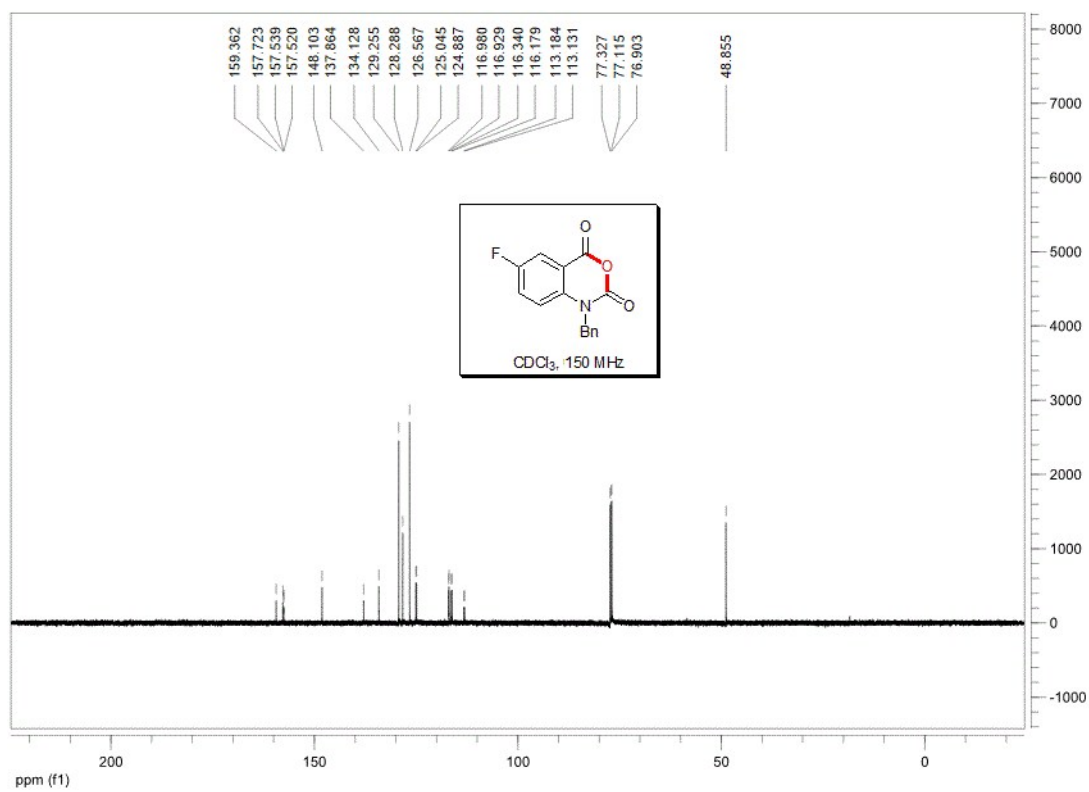

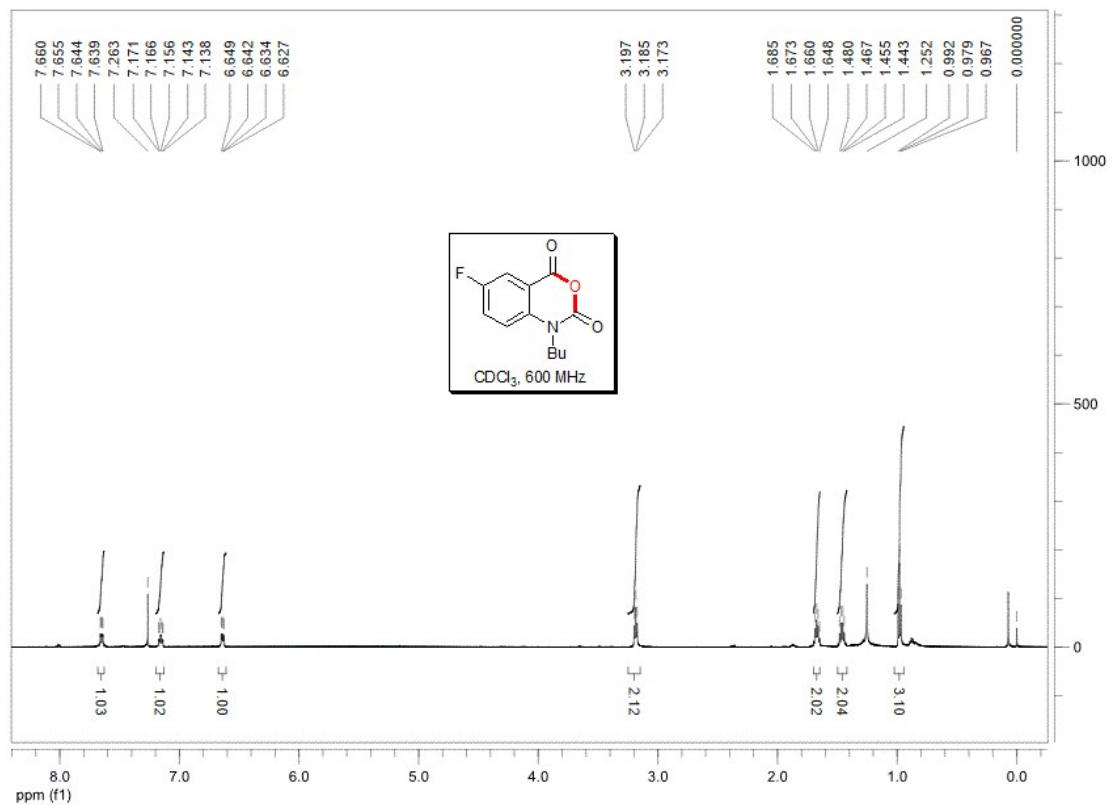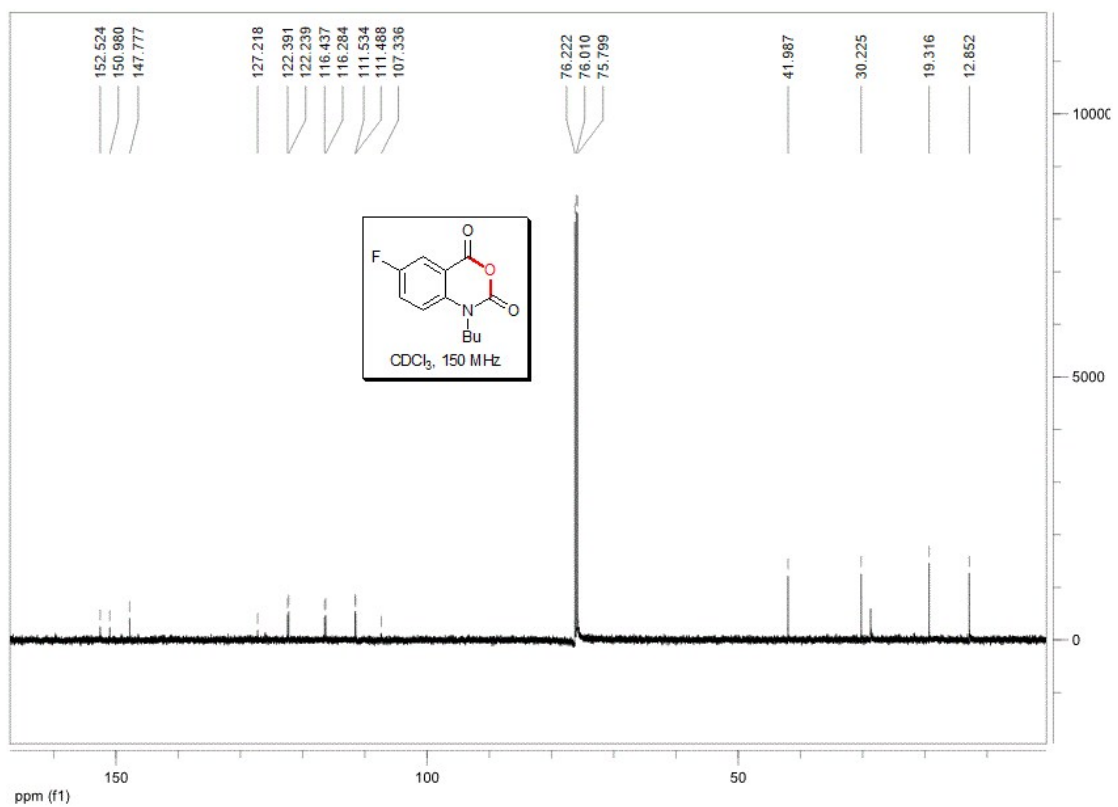

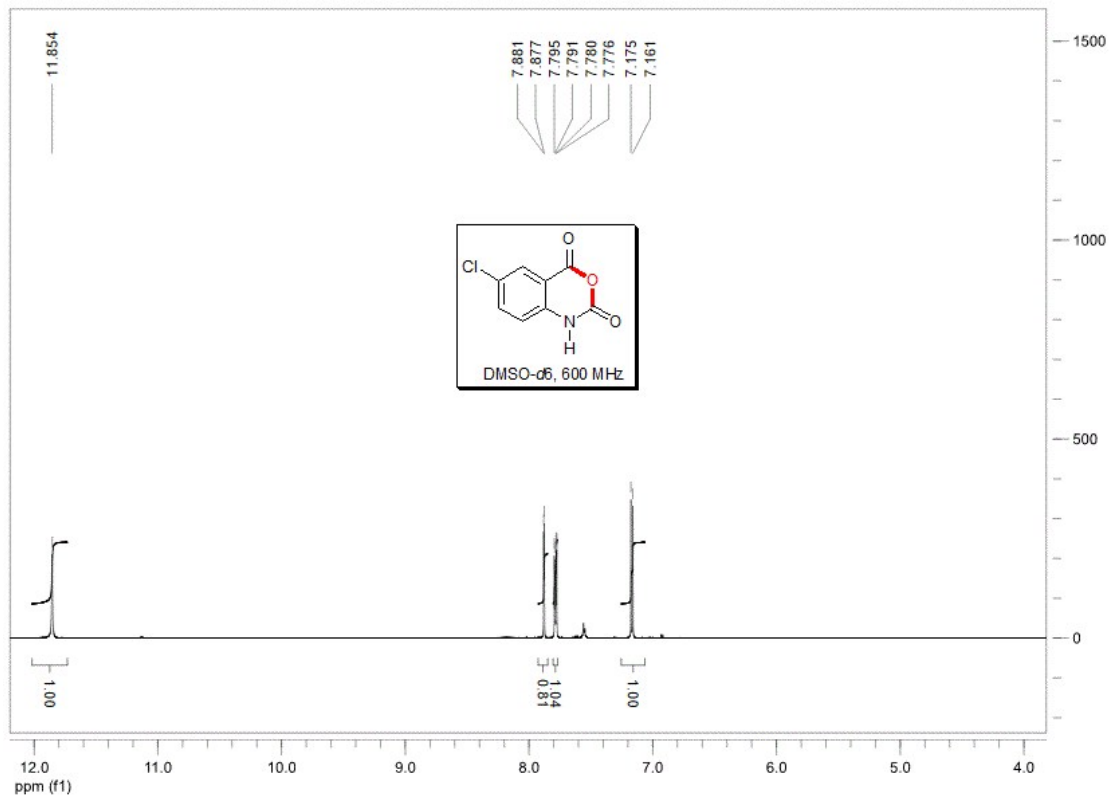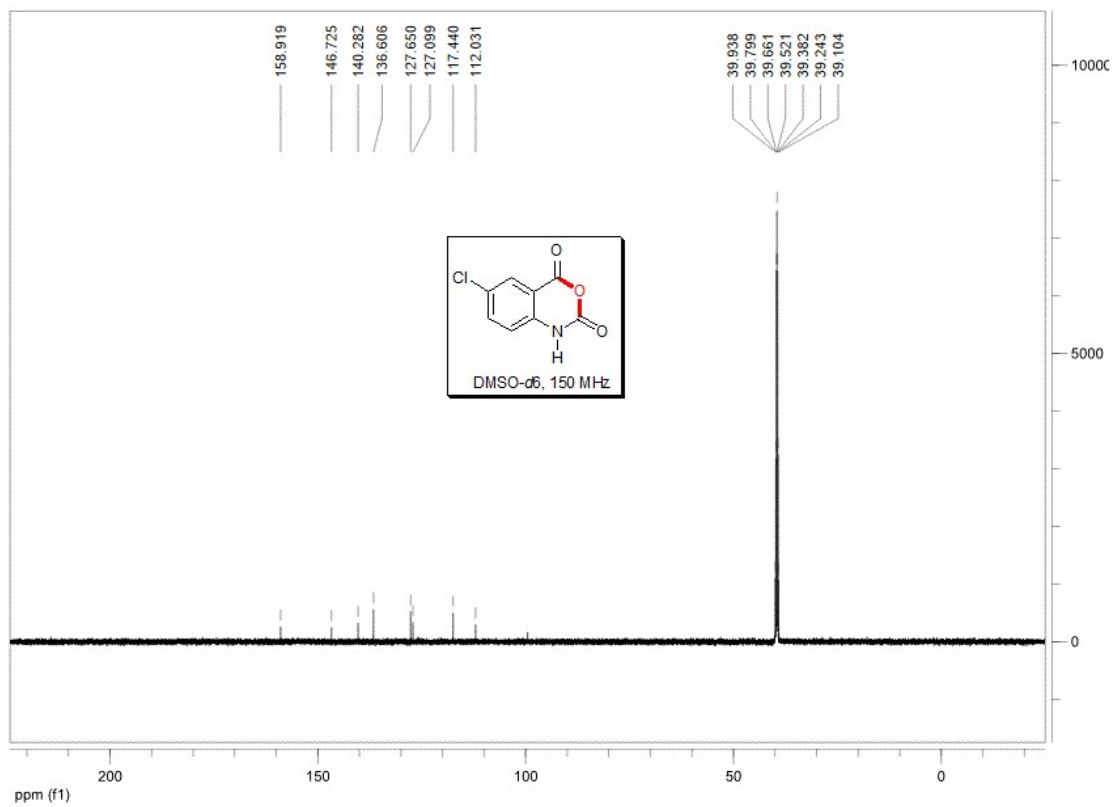



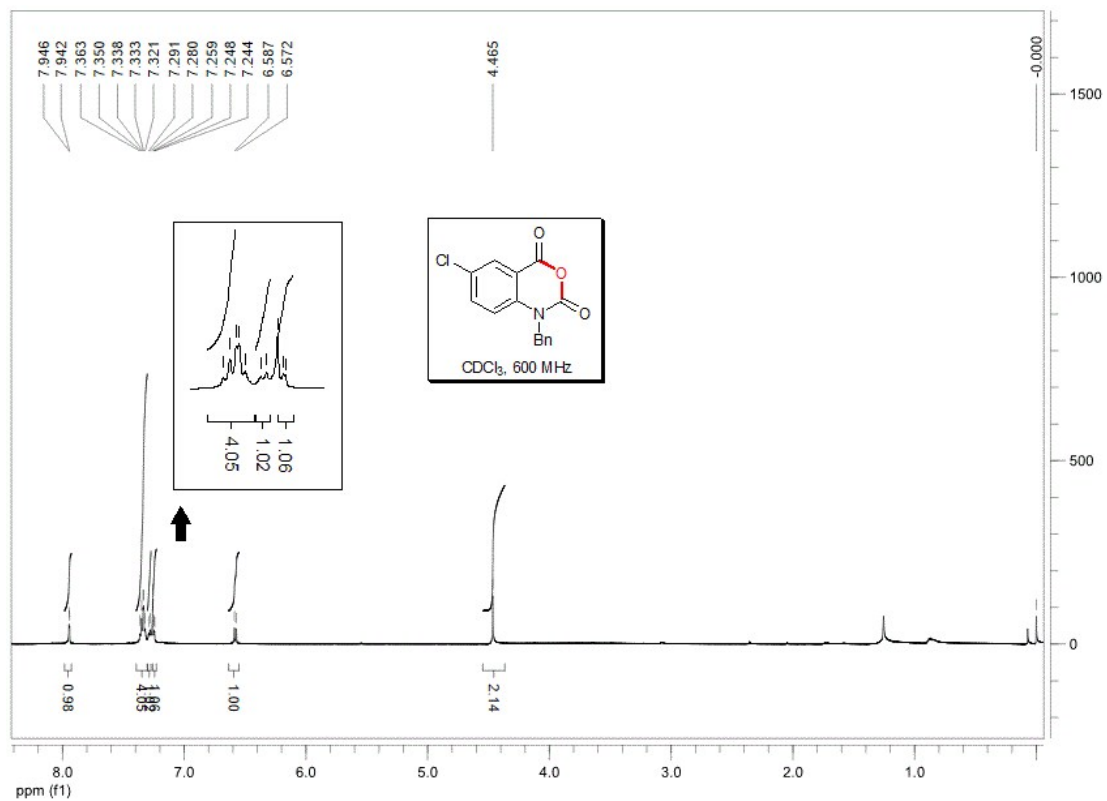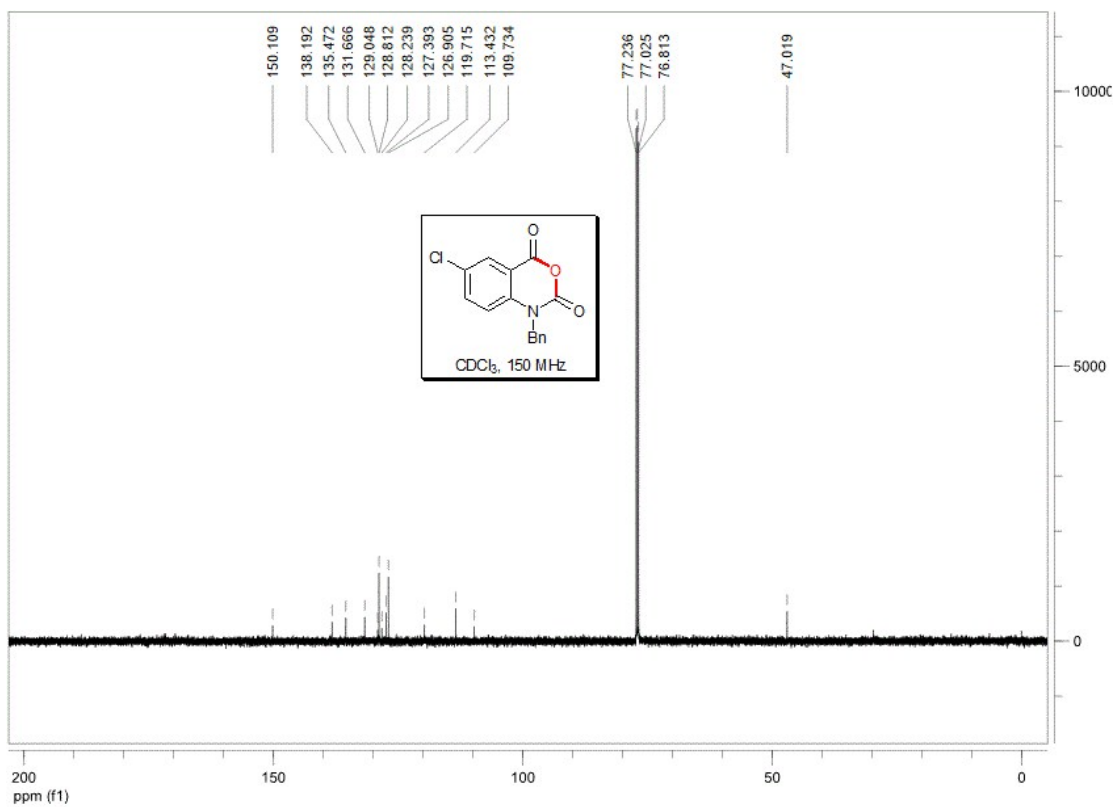

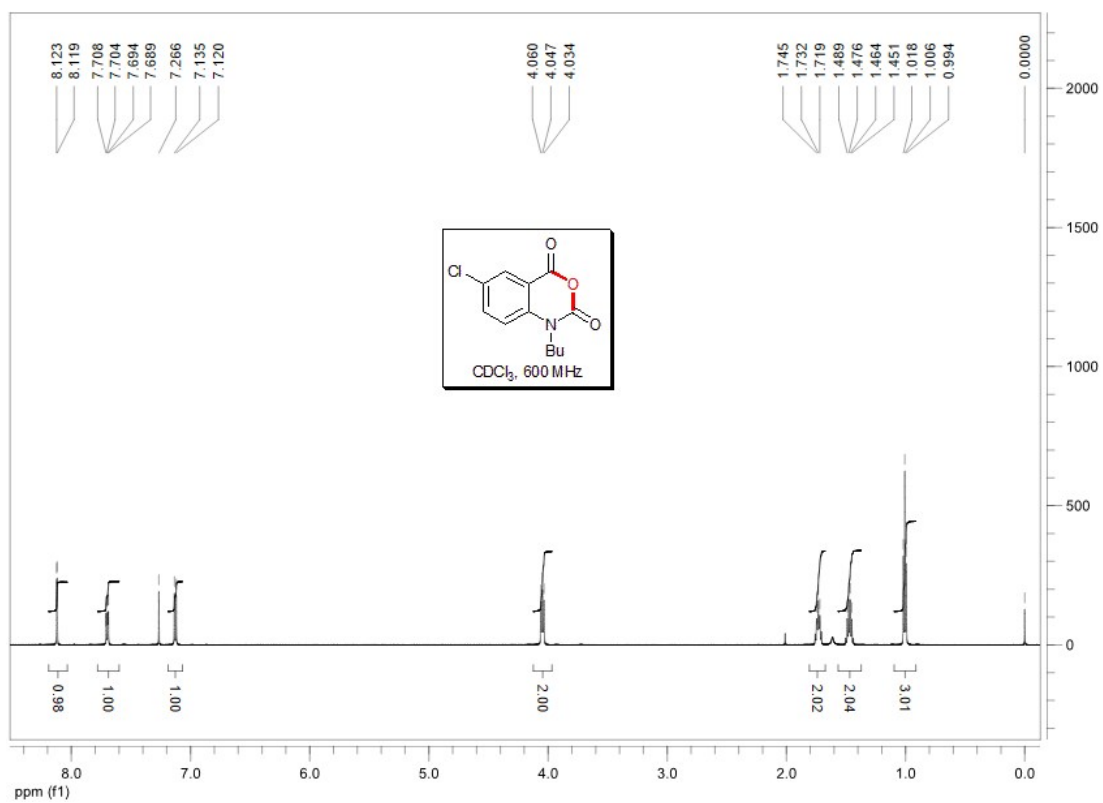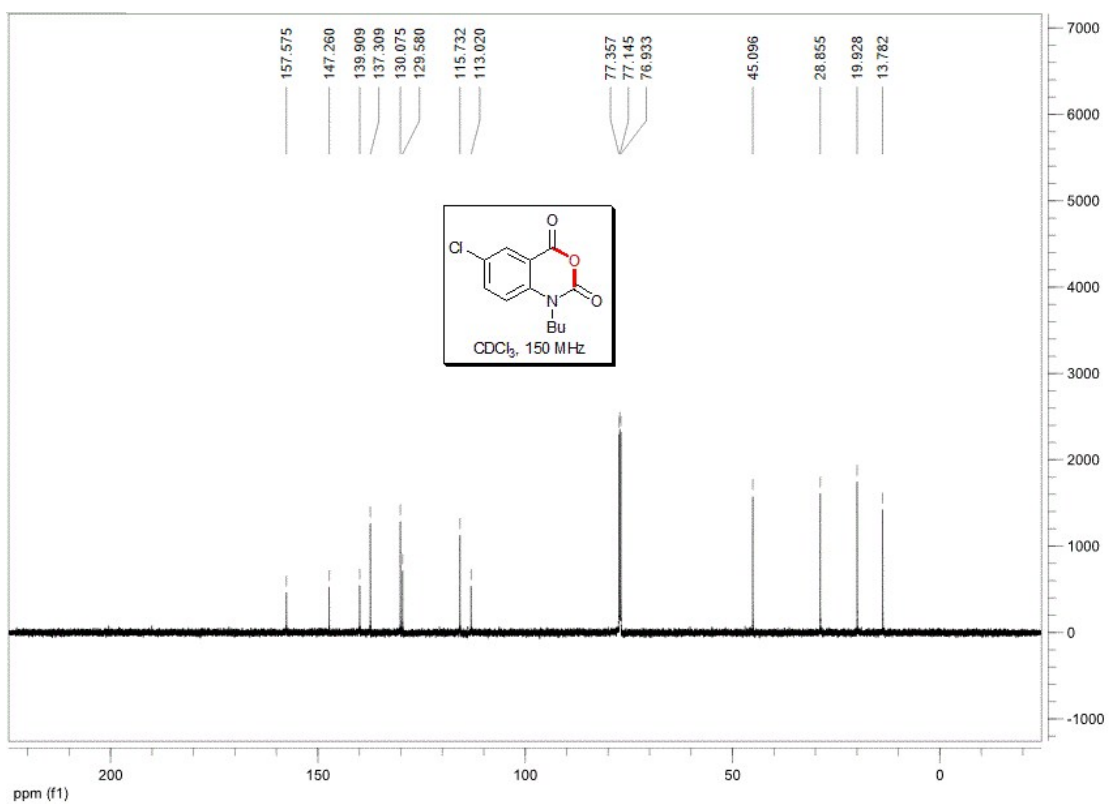

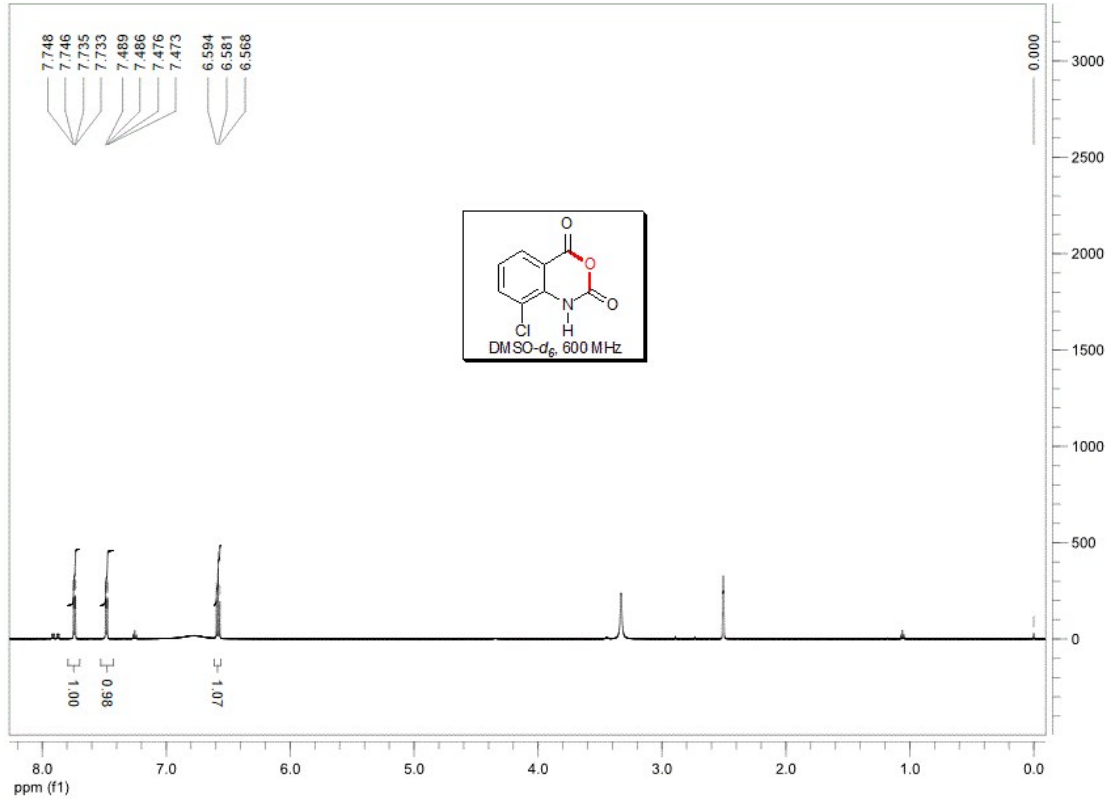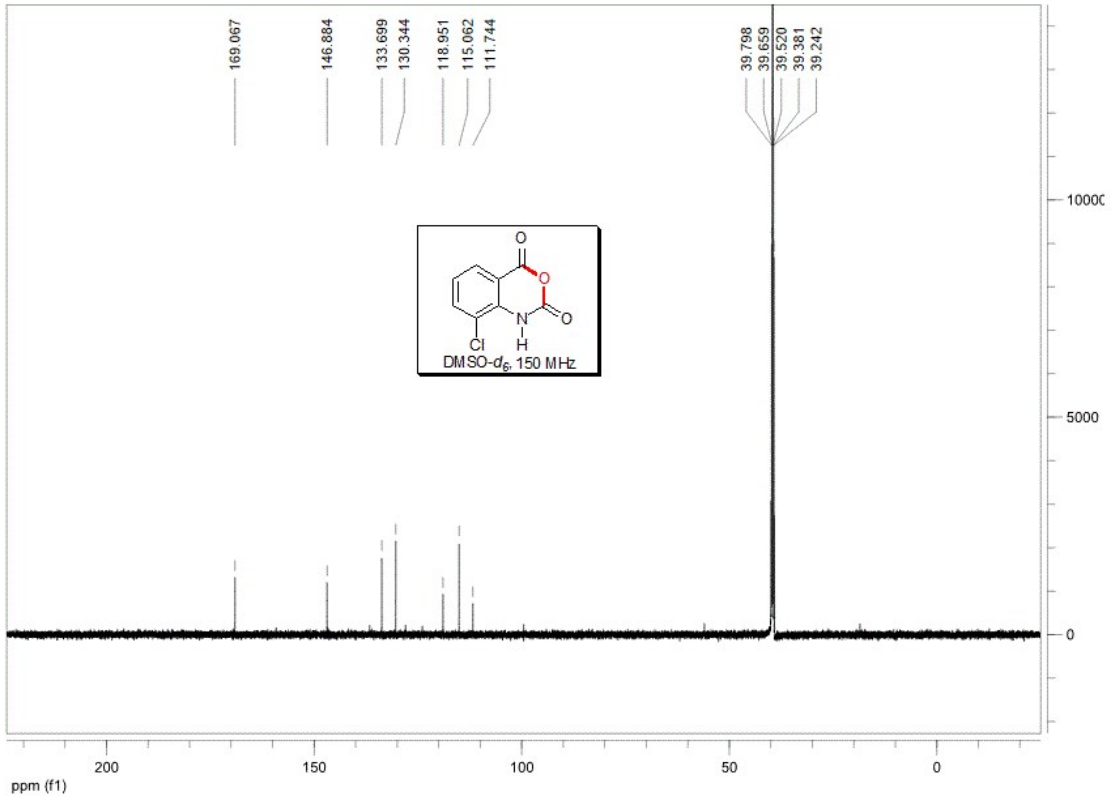

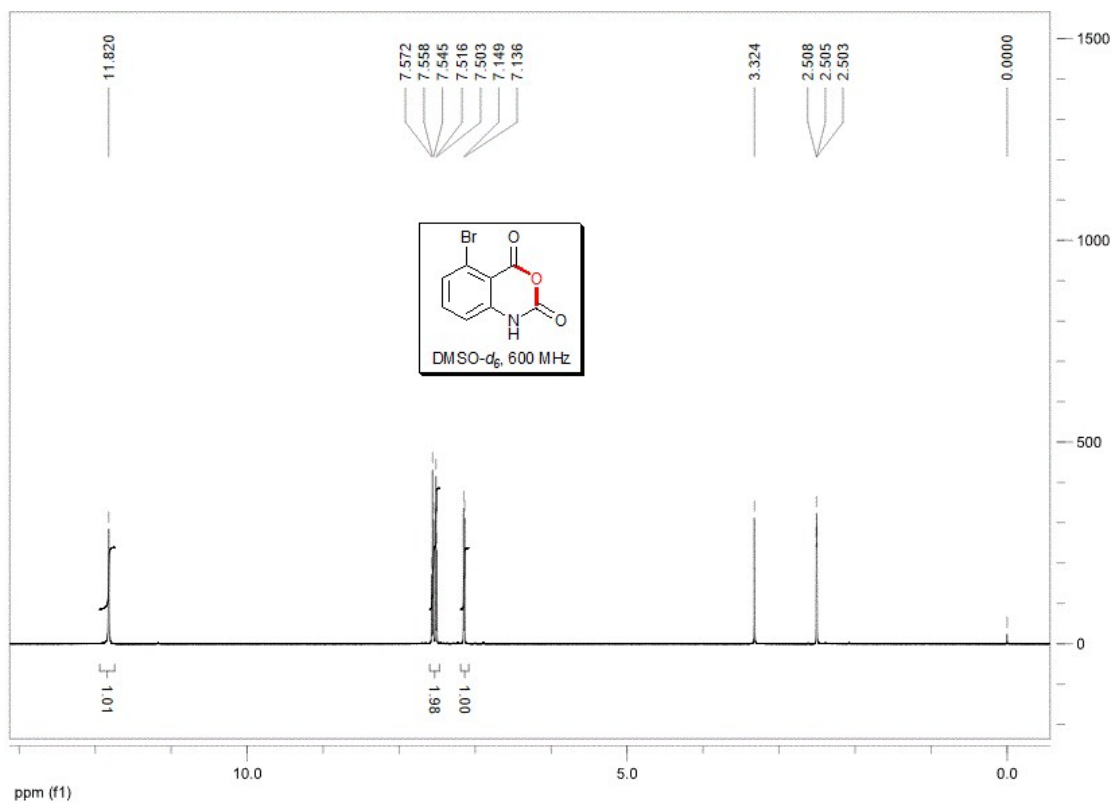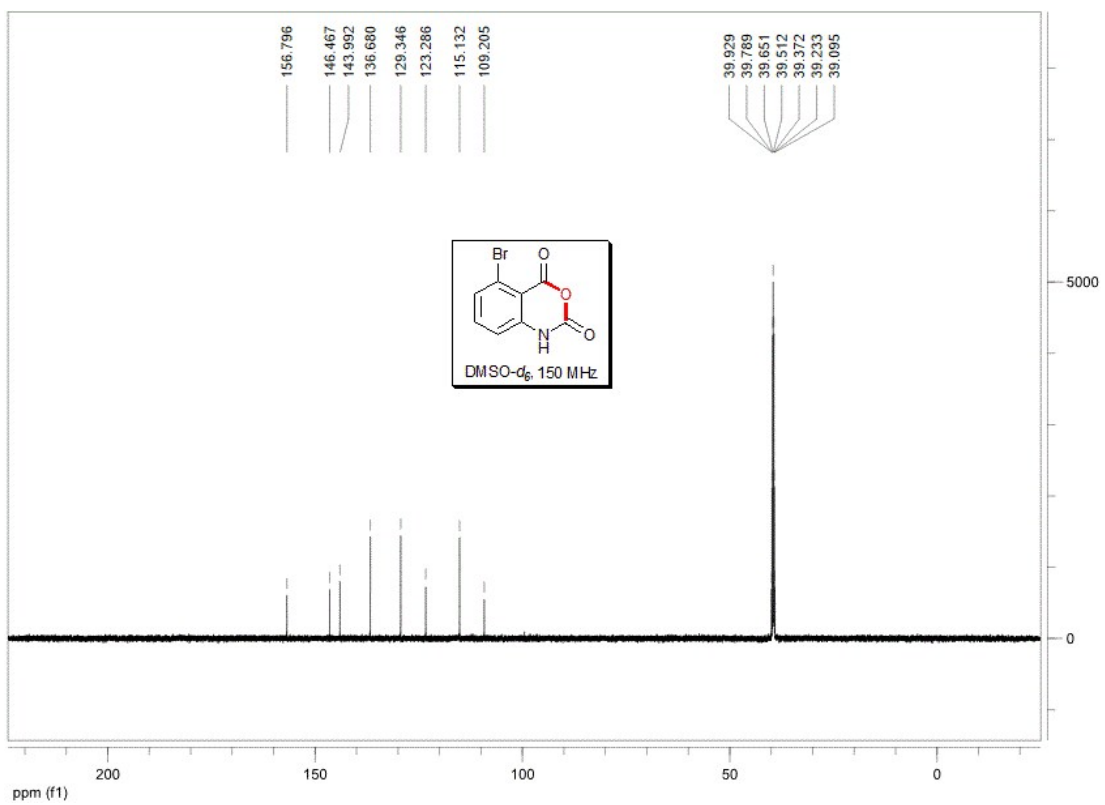

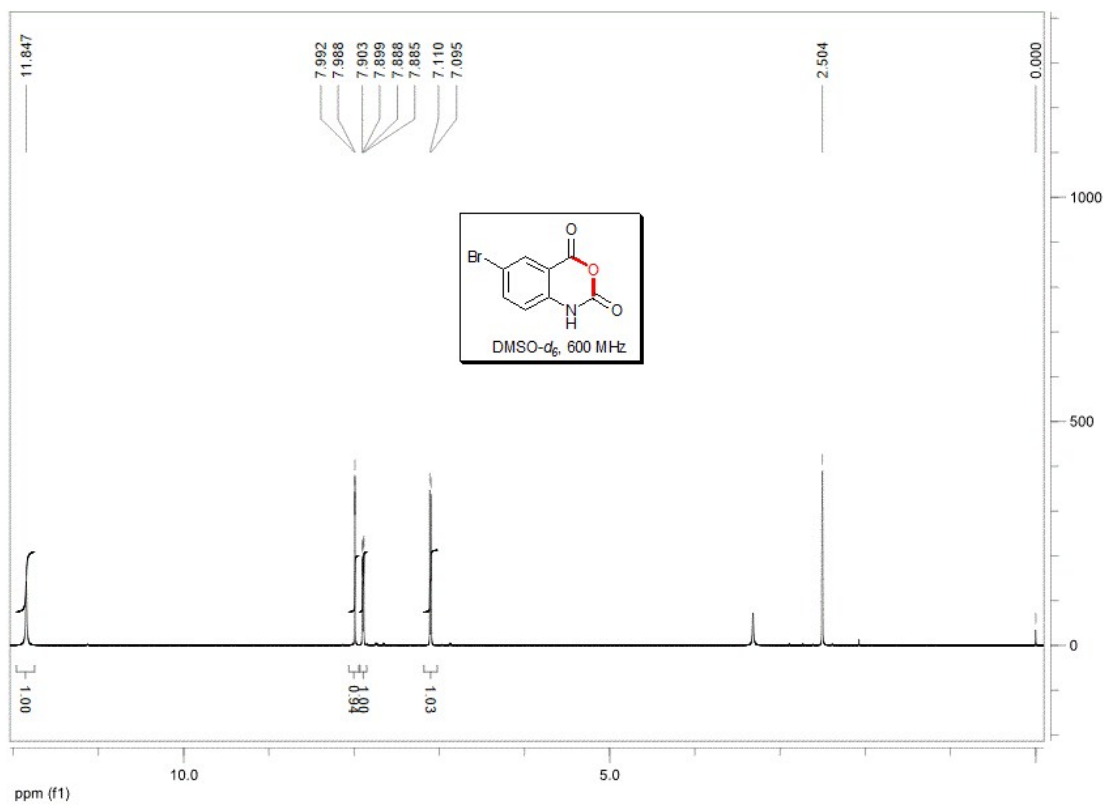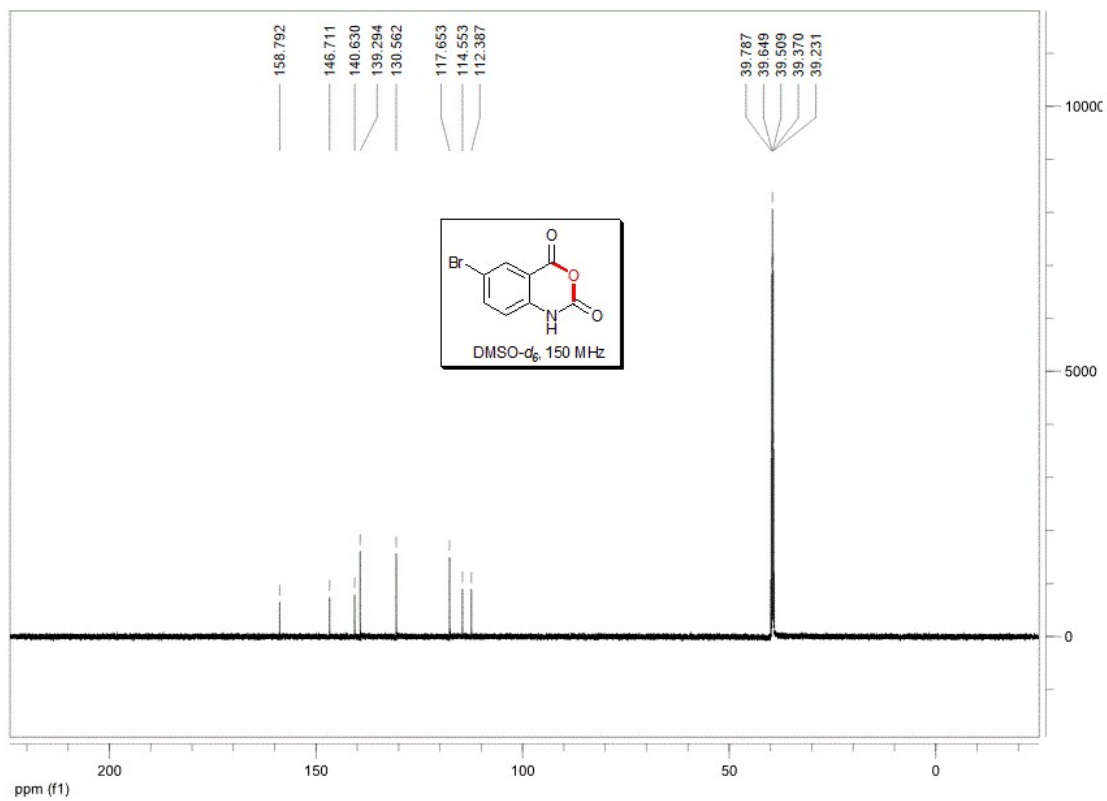

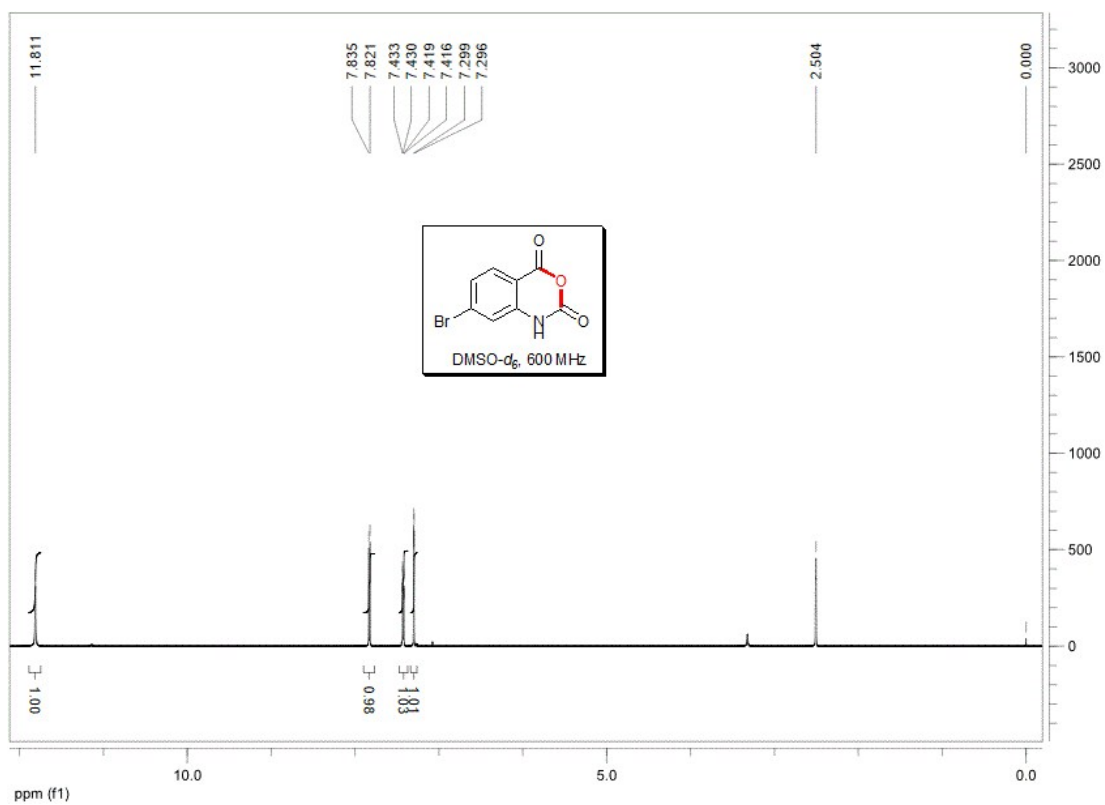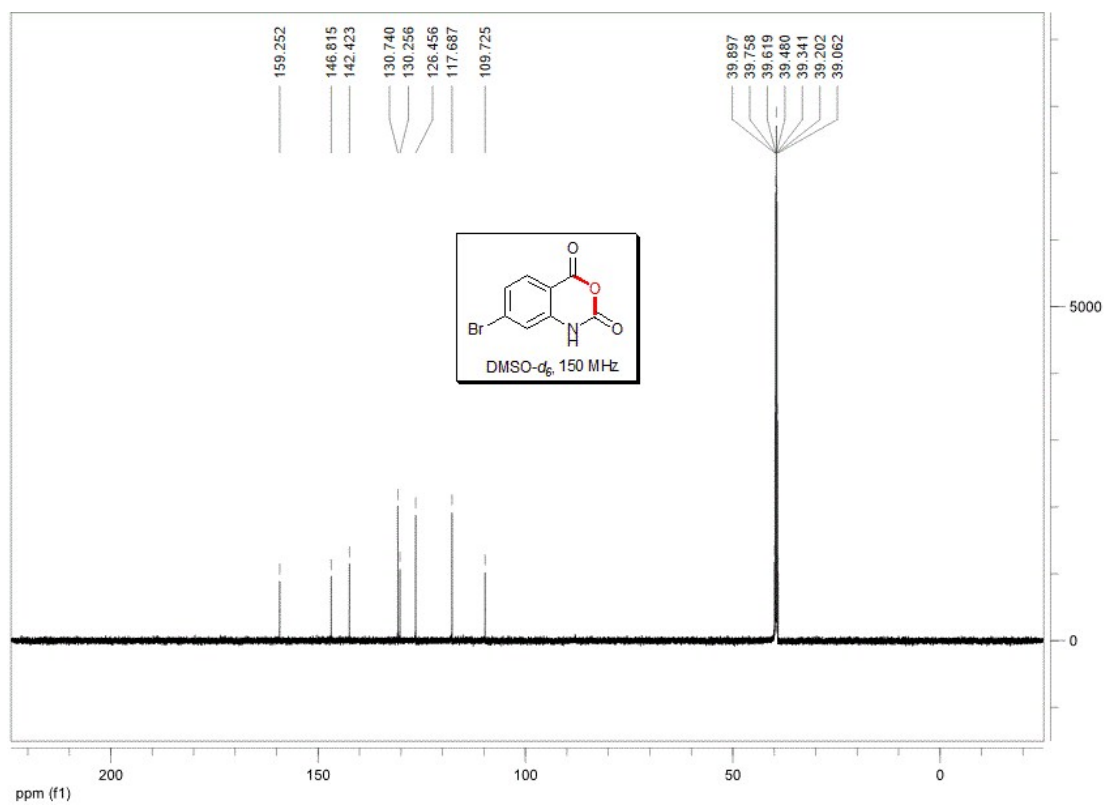

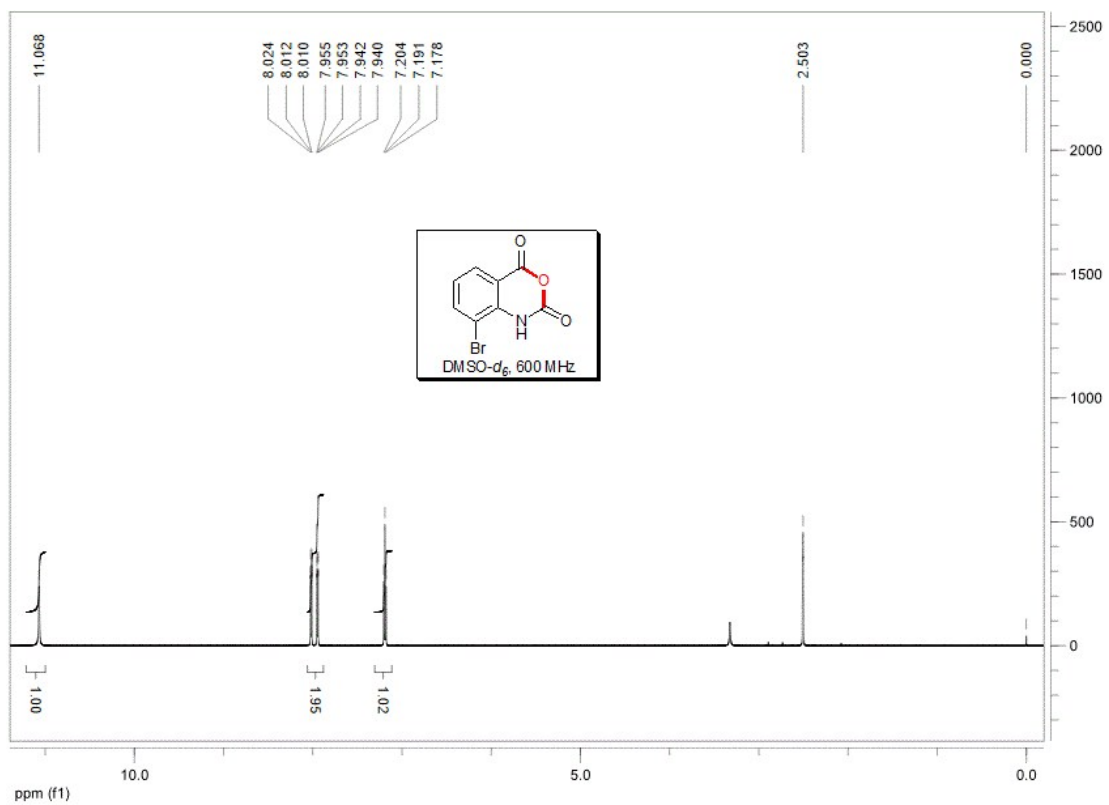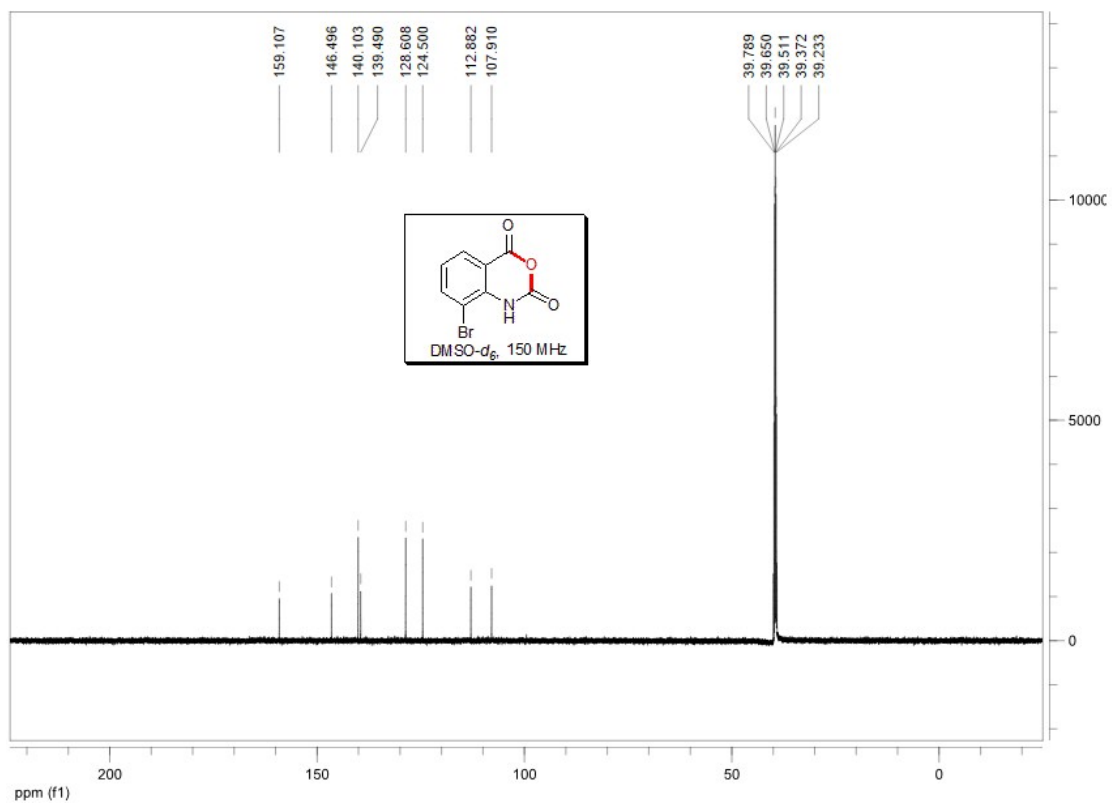

Supplement: c5cy01030f1.pdf [file c5cy01030f1.pdf]
